# Supplementary material
Source: Springer Nature journal article supplement (https://www.springermedizin.de/resource/supplementary/13054_2010_8526_MOESM4_ESM.pdf/9732162)

**A****iNOS mRNA  
in lung tissue****(copies/ $\mu$ g total RNA  
normalized to GAPDH)**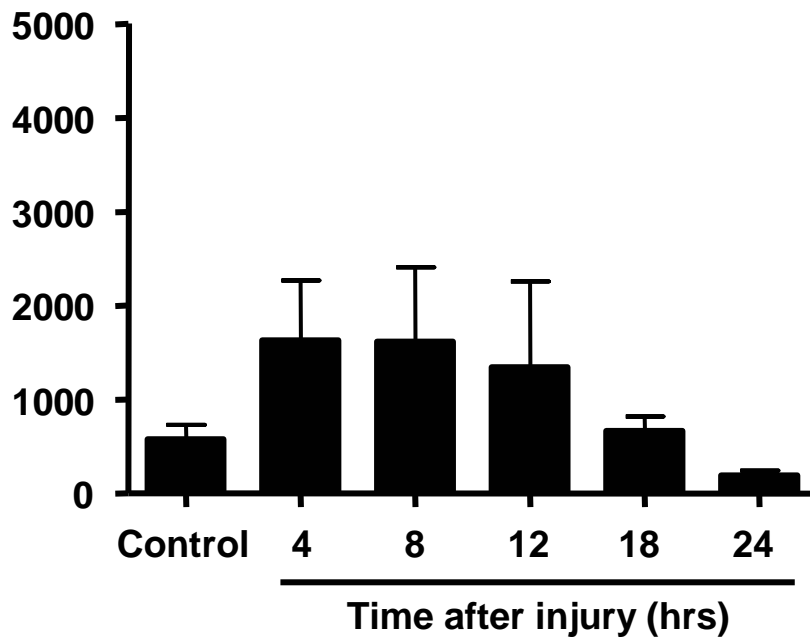**B****iNOS protein  
in lung tissue****(densitometrical units)**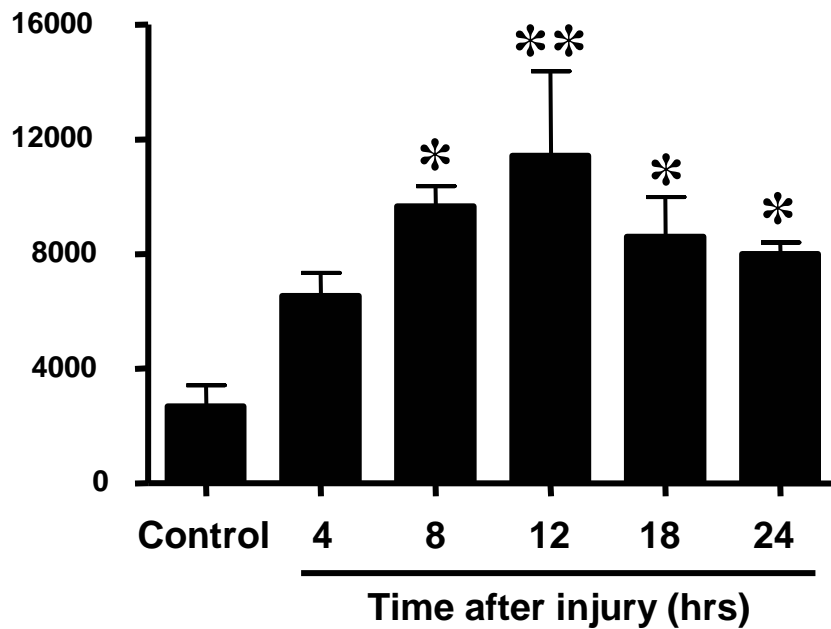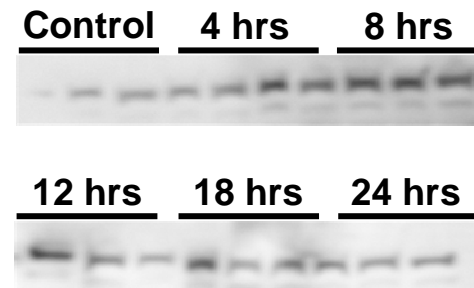

Supplement: MOESM4 [file 9732162]
